# Supplementary material
Source: Springer Nature journal article supplement (https://www.springermedizin.de/resource/supplementary/12933_2013_798_MOESM3_ESM.pdf/9539246)

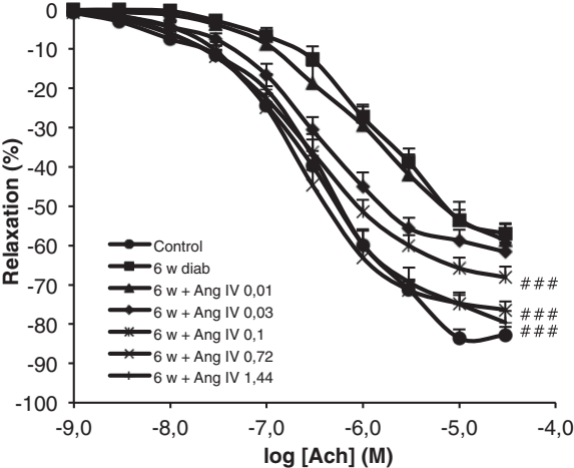

Supplement: MOESM3 [file 9539246]
